# Supplementary material for: Low-cost Y-type zeolite/carbon porous composite from coal gasification fine slag and its application in the phenol removal from wastewater: fabrication, characterization, equilibrium, and kinetic studies
Source: Royal Society of Chemistry journal article supplement (doi:10.1039/d1ra08419d), 2022-01-01
Supplement: d1ra08419d1.pdf [file d1ra08419d1.pdf]

## Supporting Information

**A low cost Y-type zeolite/carbon porous composite from coal gasification fine slag and its application in phenol remove in wastewater: Fabrication, characterization, equilibrium, and kinetic studies**

Zhen Chai<sup>a</sup>, Peng Lv<sup>a, \*</sup>, Yonghui Bai<sup>a, \*</sup>, Jiaofei Wang<sup>a</sup>, Xudong Song<sup>a</sup>,

Weiguang Su<sup>a</sup>, Guangsuo Yu<sup>a, b</sup>

<sup>a</sup> *State Key Laboratory of High-Efficiency Utilization of Coal and Green Chemical Engineering,*

*Ningxia University, Yinchuan 750021, China*

<sup>b</sup> *Institute of Clean Coal Technology, East China University of Science and Technology, Shanghai*

*200237, China*

*\*Corresponding author. Tel: 0951-2062008,*

*E-mail: [yhbai@nxu.edu.cn](mailto:yhbai@nxu.edu.cn), [lypeng@nxu.edu.cn](mailto:lypeng@nxu.edu.cn)*

**Table. S1** Proximate and ultimate analyses of CGFS

| Sample | Proximate analysis (wt./%) |                |                 | Ultimate analysis, d (wt./%) |      |      |      |      |
|--------|----------------------------|----------------|-----------------|------------------------------|------|------|------|------|
|        | V <sub>d</sub>             | A <sub>d</sub> | Fc <sub>d</sub> | C                            | H    | O*   | N    | S    |
| CGFS   | 6.96                       | 80.61          | 12.43           | 16.33                        | 0.71 | 0.76 | 0.08 | 1.51 |

Note: V<sub>d</sub>: Volatile; A: Ash; Fc<sub>d</sub>: Fixed carbon; d: dry basis; \*by difference

**Table. S2** Pore structure parameters of samples

| Sample                          | S <sub>BET</sub> (m <sup>2</sup> /g) | S <sub>t-plot</sub> (m <sup>2</sup> /g) | V <sub>total</sub> (cm <sup>3</sup> /g) | V <sub>micro</sub> (cm <sup>3</sup> /g) | V <sub>meso</sub> (cm <sup>3</sup> /g) |
|---------------------------------|--------------------------------------|-----------------------------------------|-----------------------------------------|-----------------------------------------|----------------------------------------|
| CGFS                            | 111.09                               | 18.89                                   | 0.14                                    | 0.01                                    | 0.13                                   |
| Y-type zeolite/carbon composite | 439.68                               | 234.45                                  | 0.35                                    | 0.12                                    | 0.23                                   |

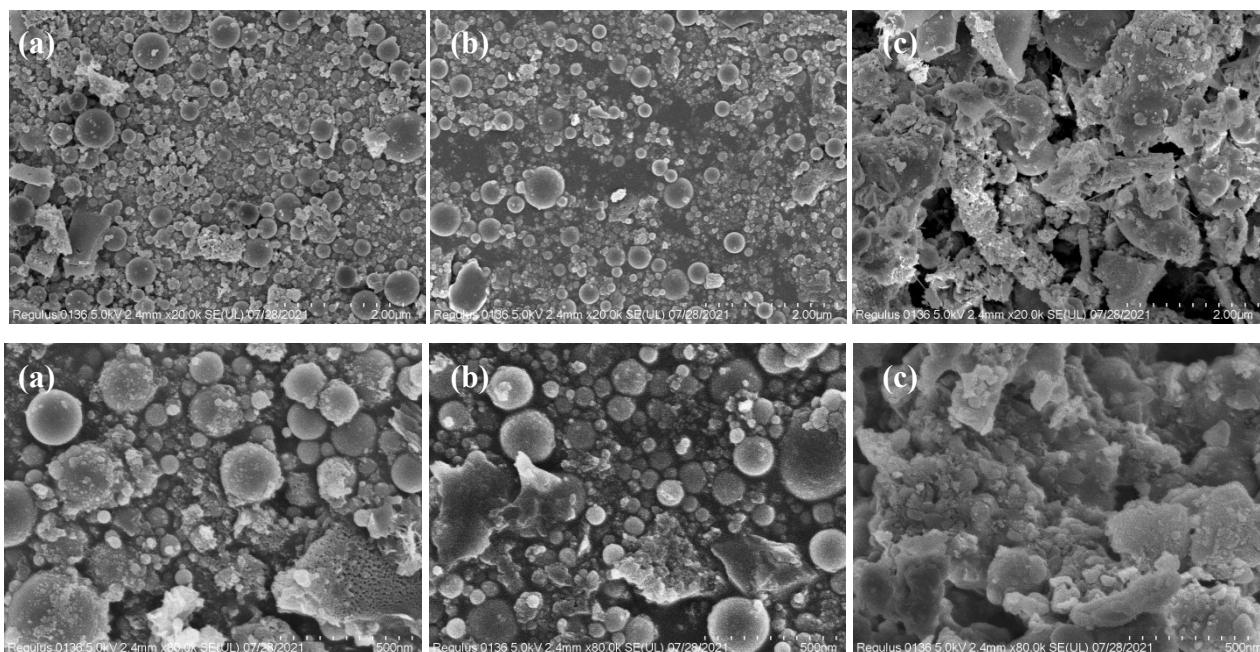

**Fig. S1** SEM images of CGFS (a), HCGFS (b), HCGFS-HH (c)

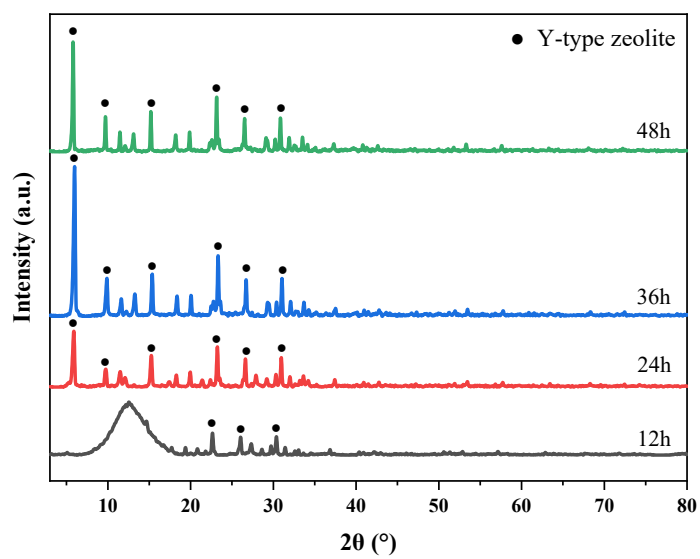

**Fig. S2** XRD patterns of materials with different crystallization times

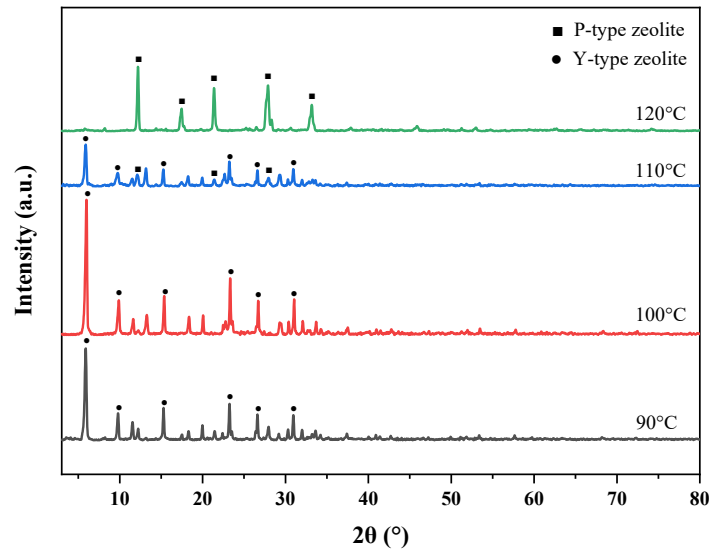

Fig. S3 XRD patterns of materials prepared at different crystallization temperatures

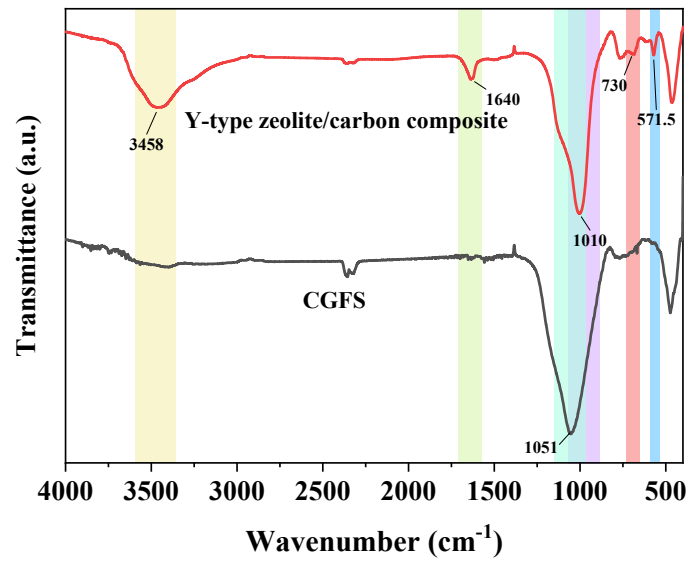

Fig. S4 FT-IR spectra of samples

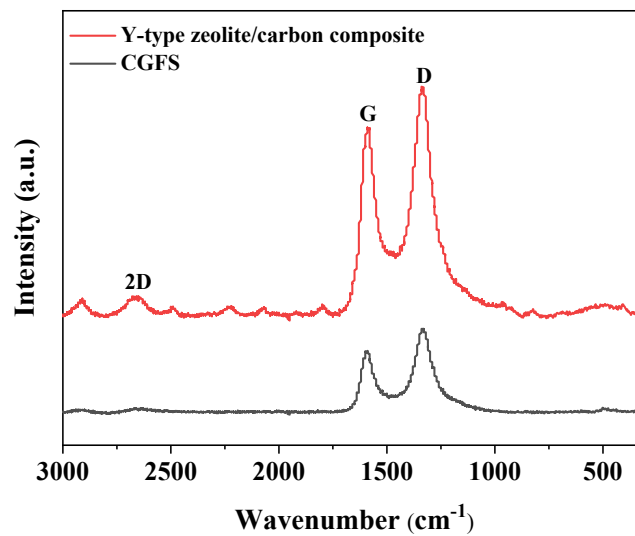

Fig. S5 Raman spectrum of the samples

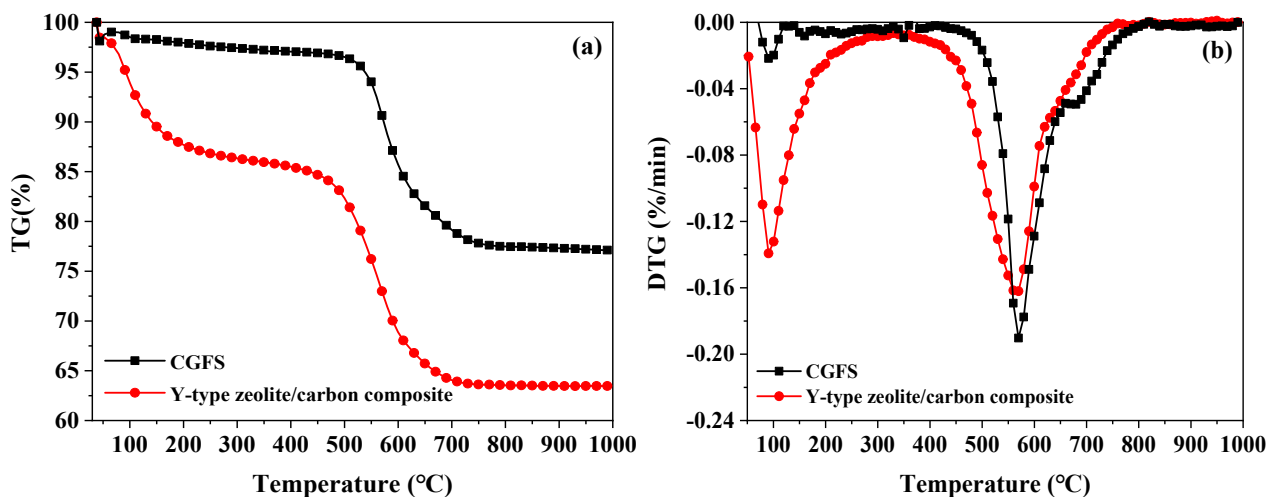

Fig. S6 TG (a) and DTG (b) curves of samples

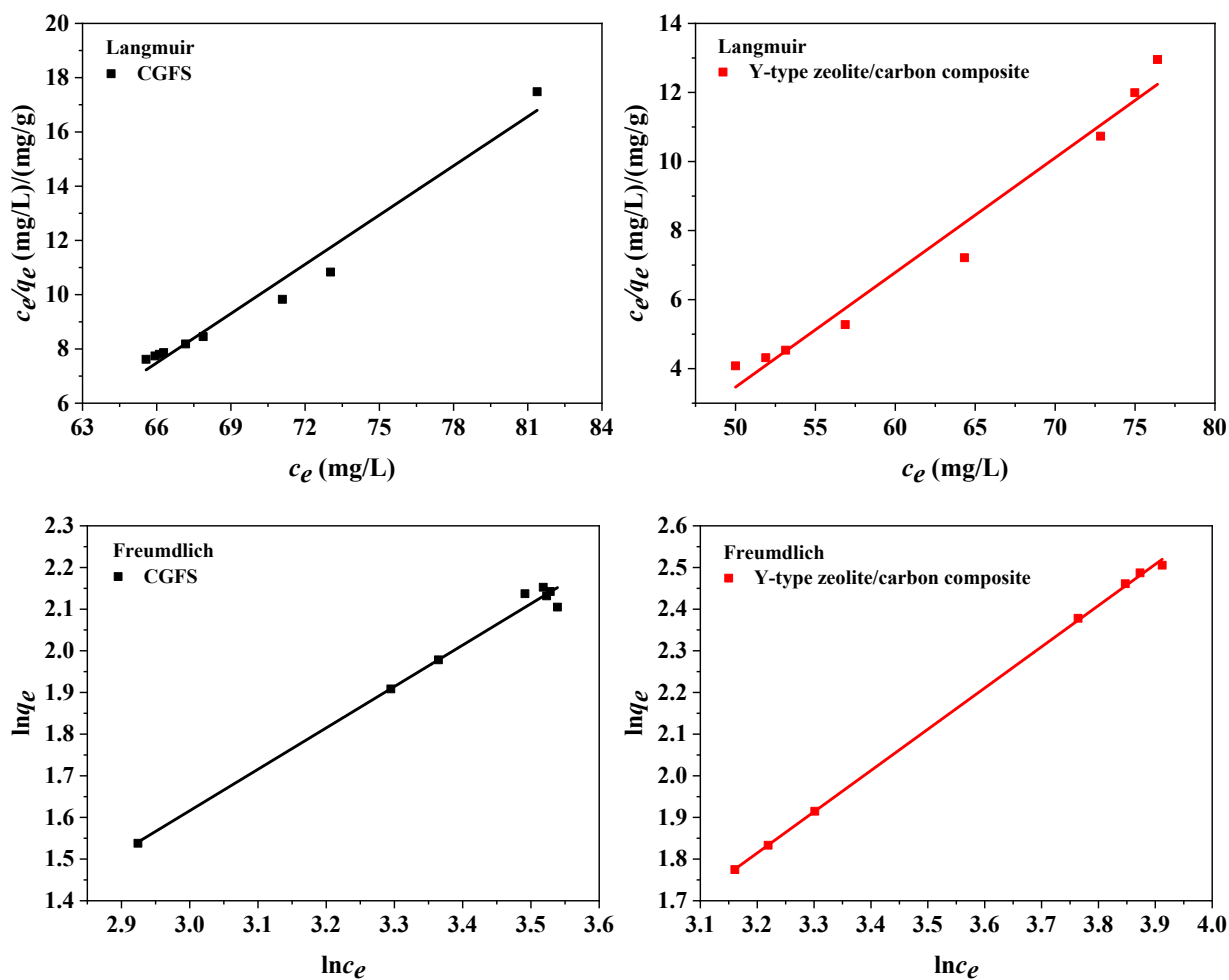

Fig. S7 Adsorption isotherms of phenol onto samples
